# Supplementary material
Source: publisher site journal article supplement (https://www.spandidos-publications.com/965/downloadSupplementary)

Figure S1. Morphological changes in BMSCs. This was induced with dosage of 50, 100 and 200  $\mu\text{g}$  of Schwann cell-derived exosomes (magnification, x200). BMSCs, bone marrow mesenchymal stem cells.

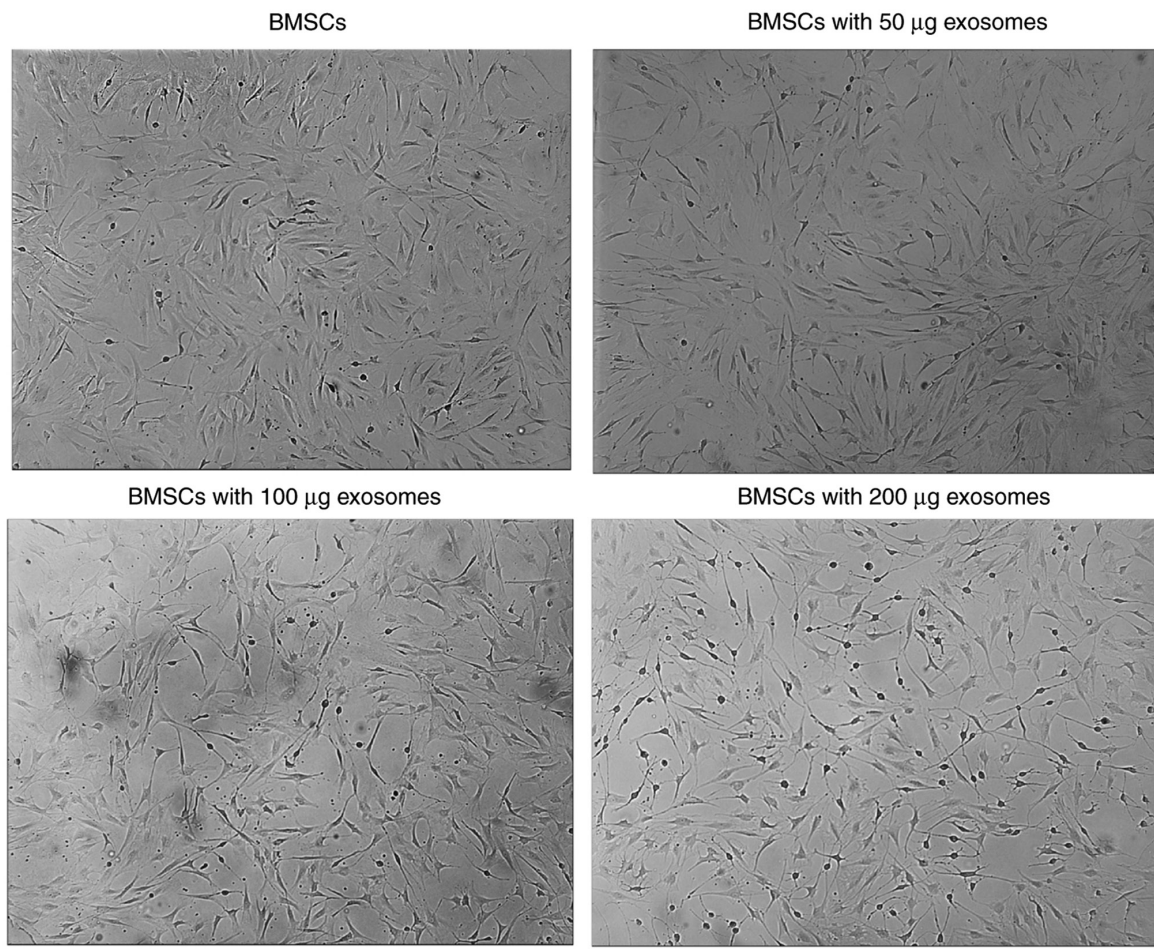

Supplement: Supplementary file 1 [file downloadSupplementary]
